# Supplementary material for: GNSS-RO residual ionospheric error (RIE): a new method and assessment
Source: Copernicus journal article supplement (doi:10.5194/amt-18-843-2025), 2025-02-19
Supplement: Supplementary file 1 [file amt-18-843-2025-supplement.pdf]

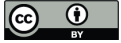

*Supplement of*

## **GNSS-RO residual ionospheric error (RIE): a new method and assessment**

**Dong L. Wu et al.**

*Correspondence to:* Dong L. Wu ([dong.l.wu@nasa.gov](mailto:dong.l.wu@nasa.gov))

The copyright of individual parts of the supplement might differ from the article licence.

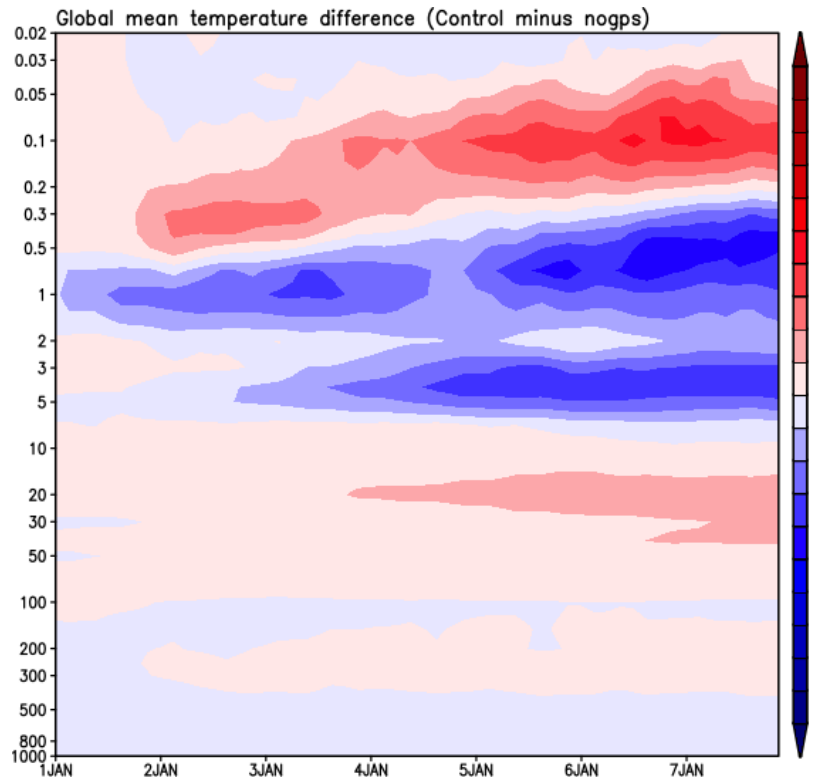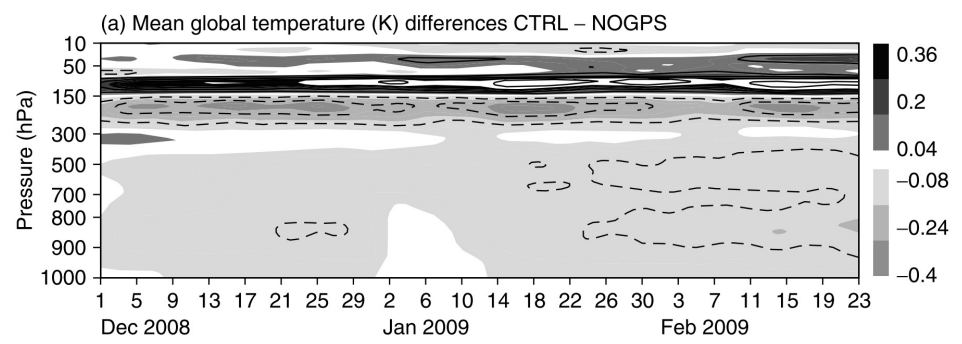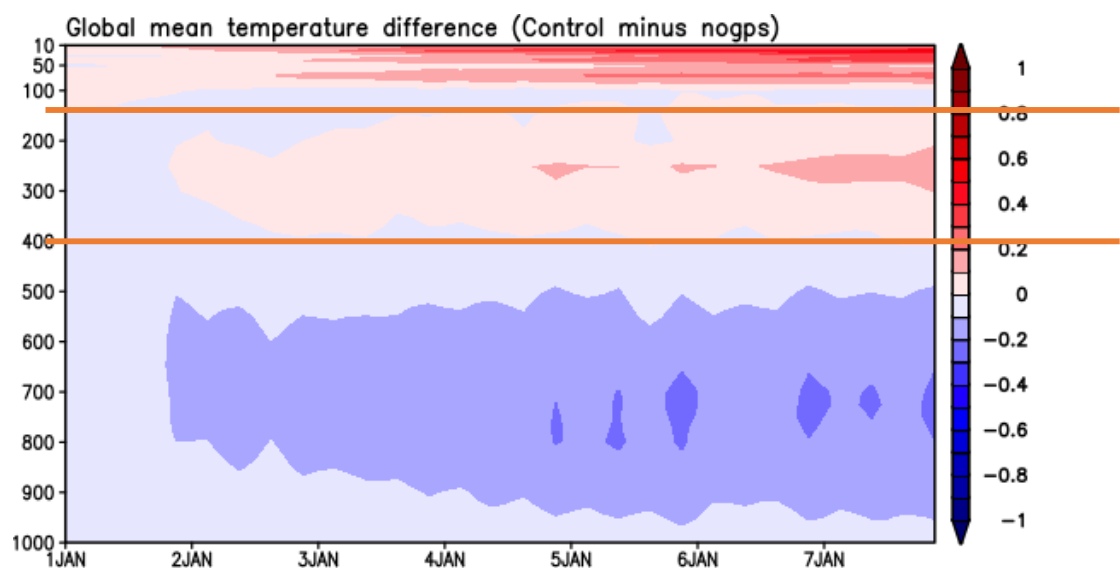

Need an independent data to evaluate the impact

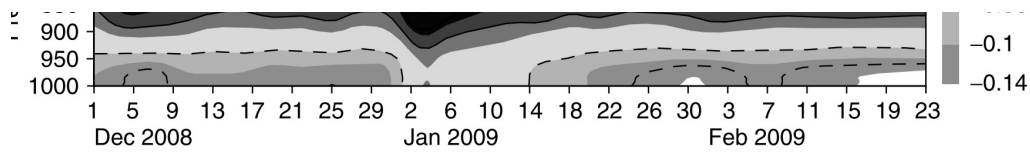

(b) Mean specific humidity ( $\text{g kg}^{-1}$ ) differences CTRL - NOGPS: Land

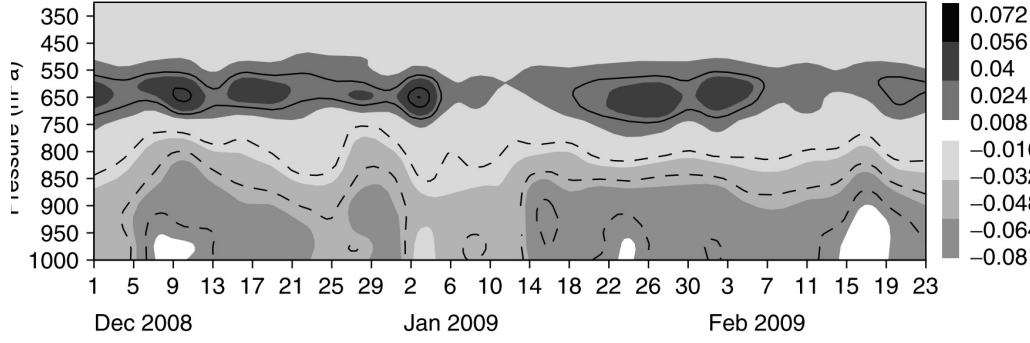

Global mean specific humidity(mg/Kg) difference (Control minus nogps)

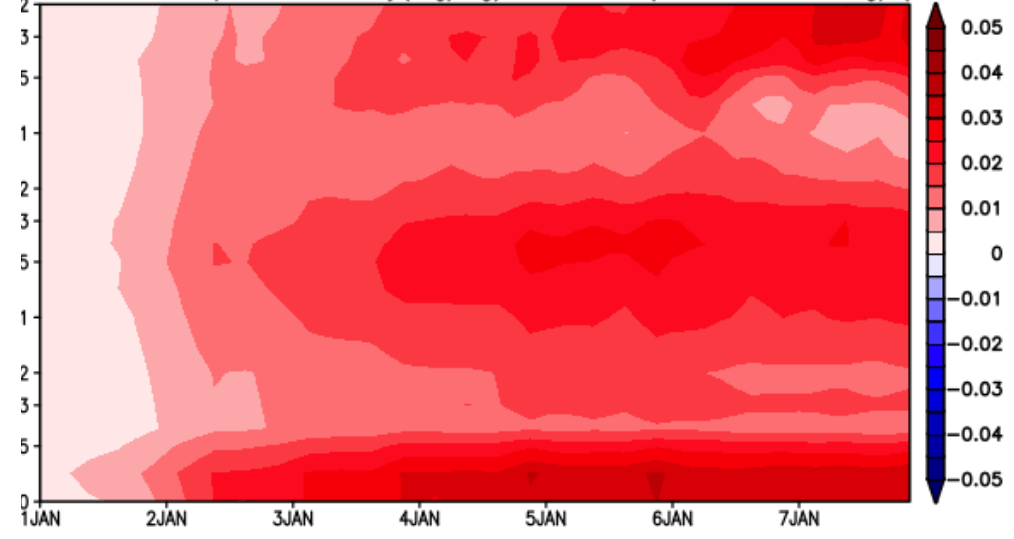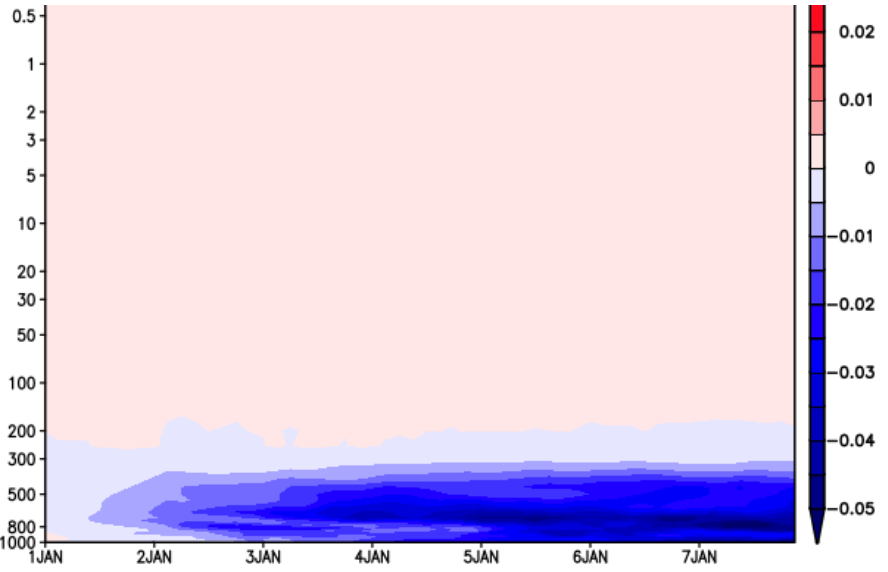

Global mean specific humidity(g/Kg) difference (Control minus nogps)

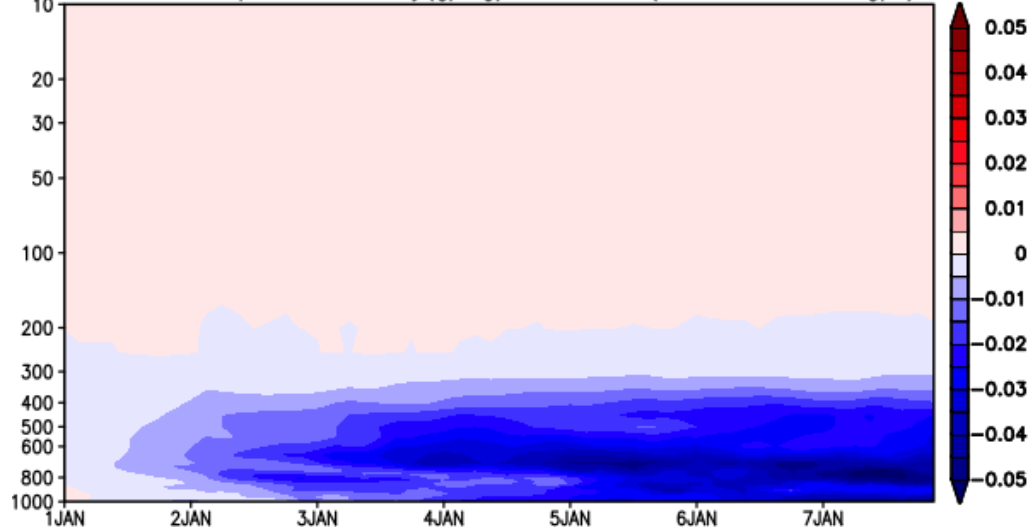

## Global mean temperature profile (Day 1 to Day 7)

### Control - nogps

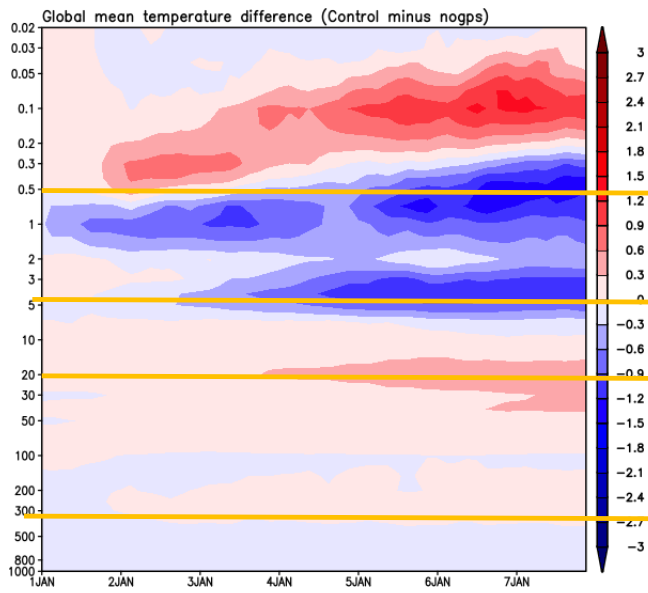

### Control - biasm2

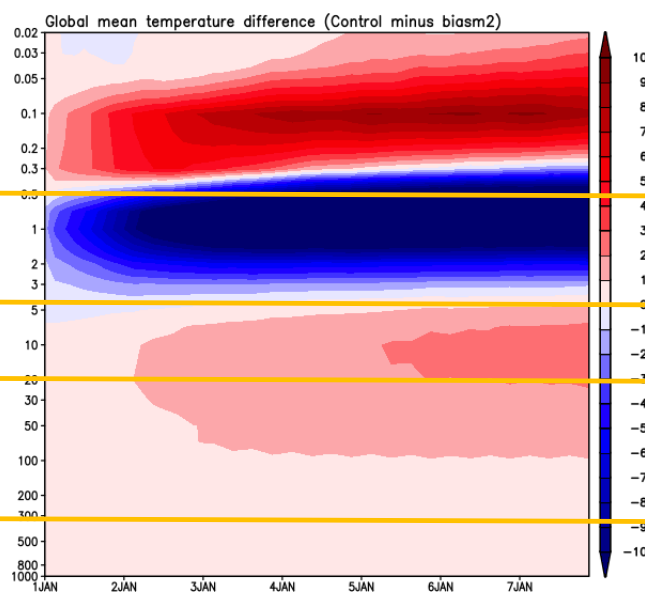

### Control - biaslst

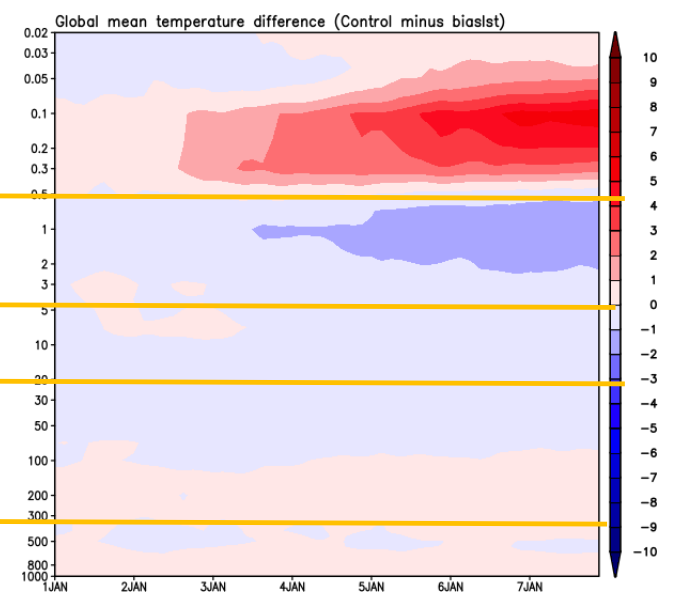

## 3-hourly mean temperature profile for first 7-days

Control - nogps

Control - biasm2

Control - biaslst

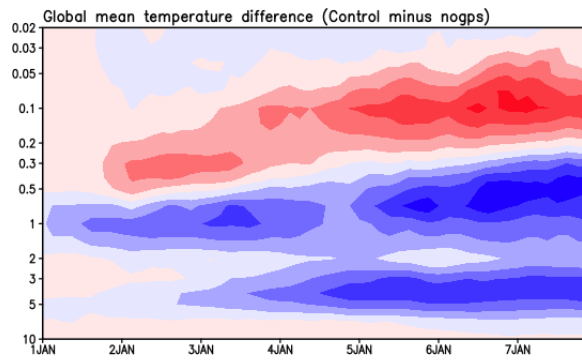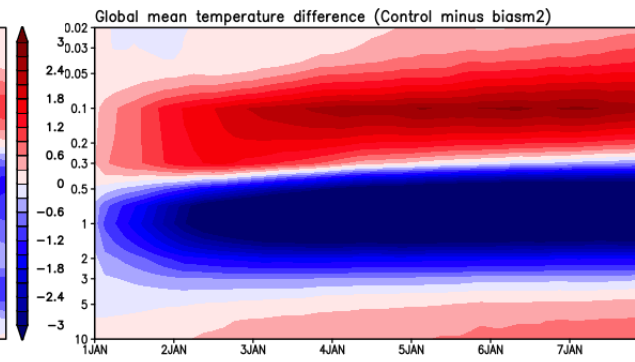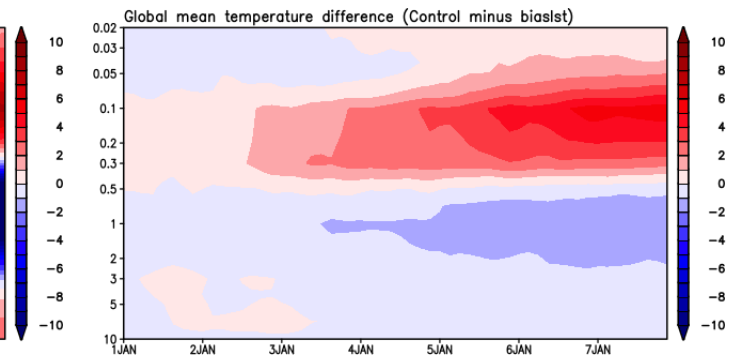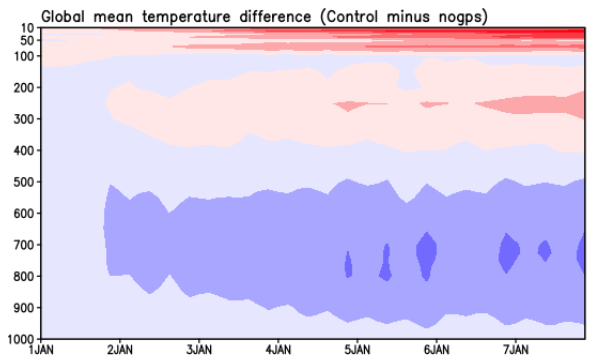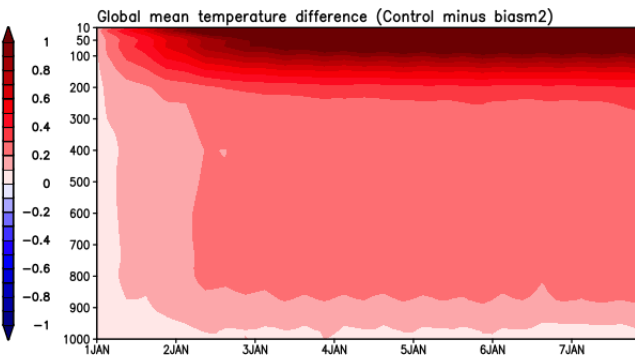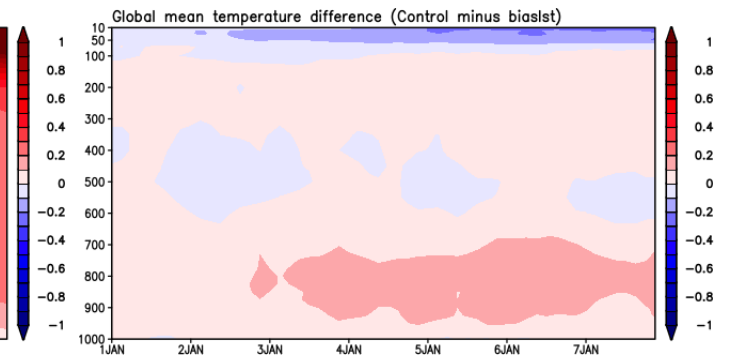

Global mean temperature differences

Control - nogps

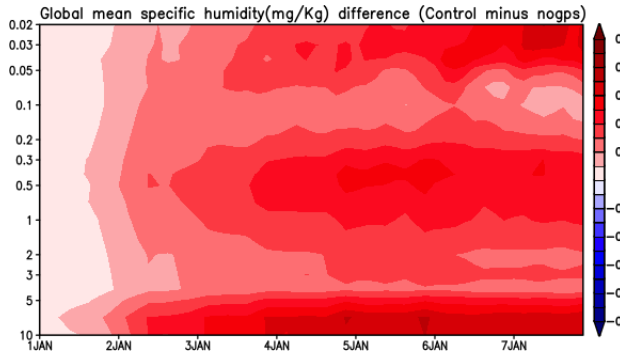

Control - biasm2

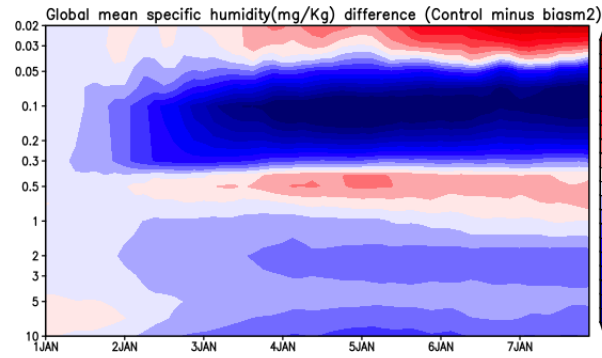

Control - biaslst

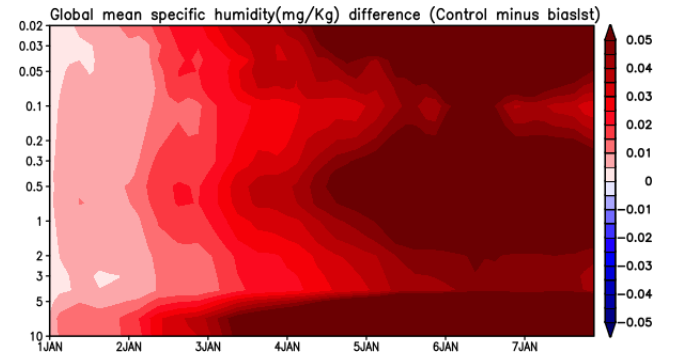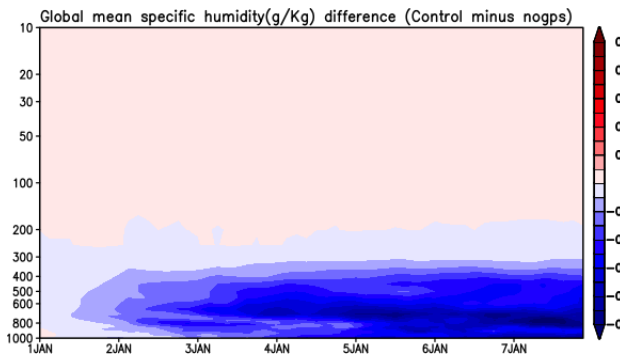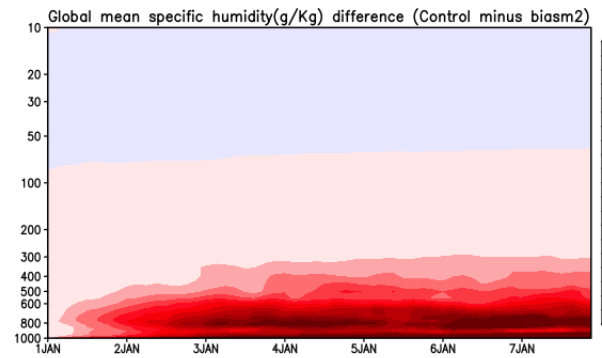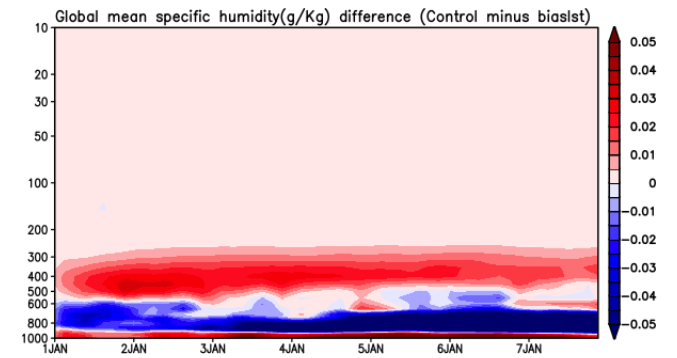

Global mean specific humidity

Control - nogps

Control - biasm2

Control - biaslst

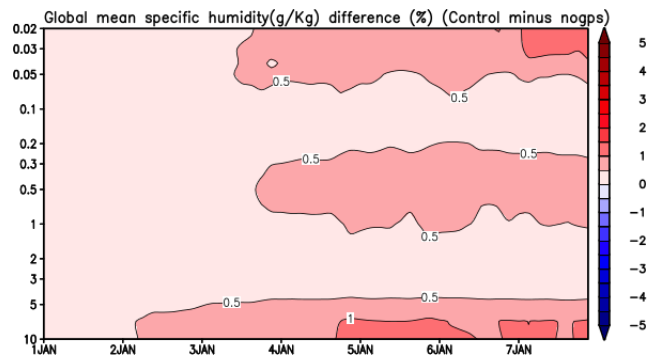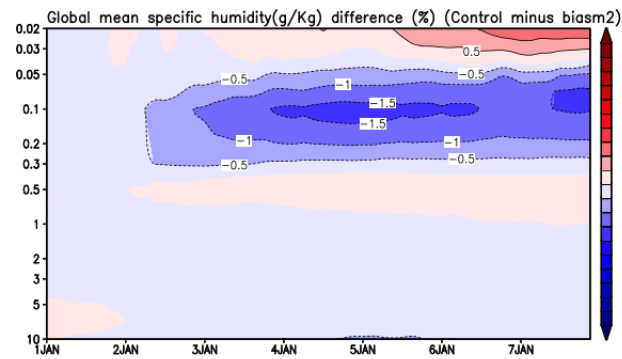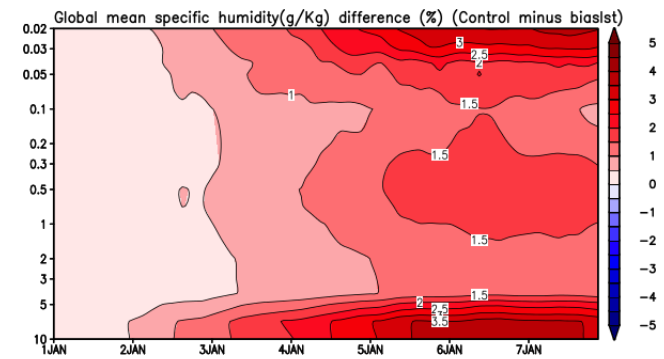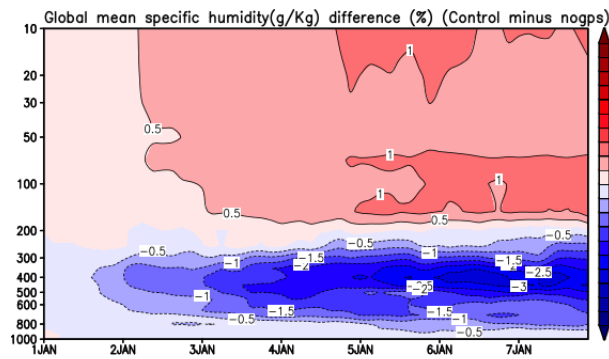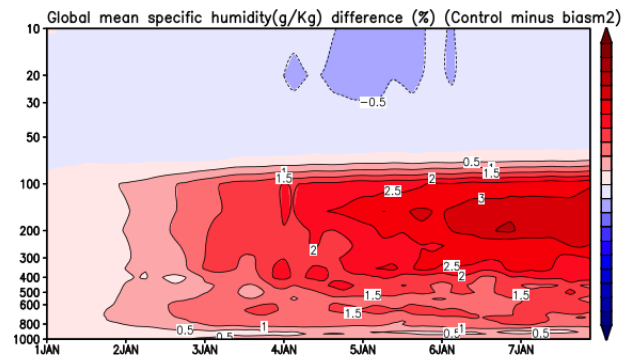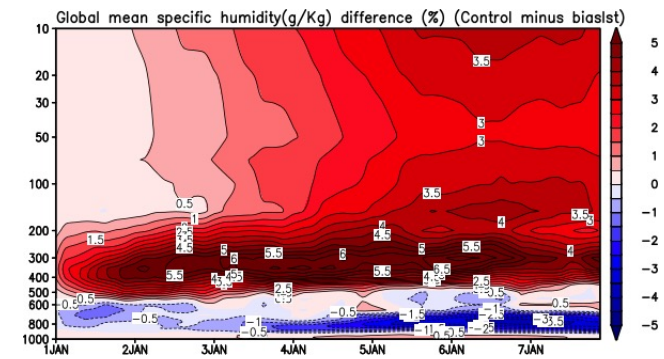

Global mean specific humidity (% difference)

Zonal mean temperature anomalies (biaslst, Day 1-23) (after time mean)

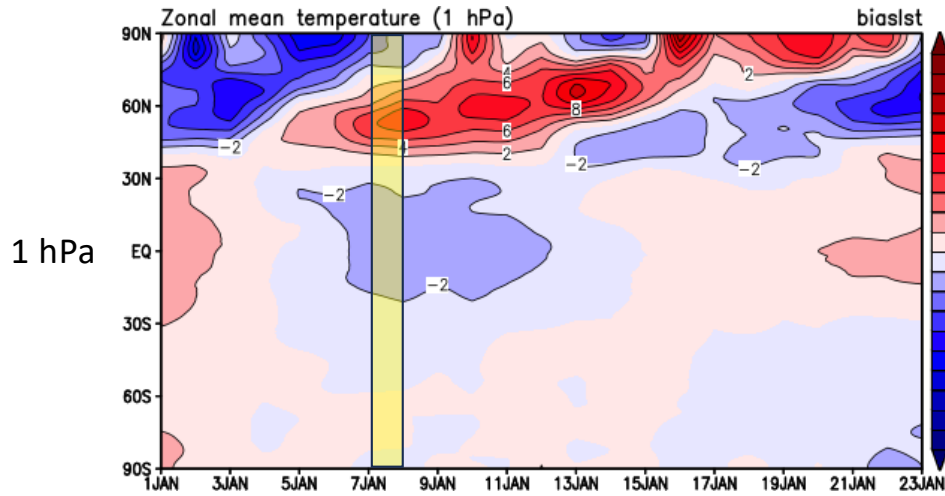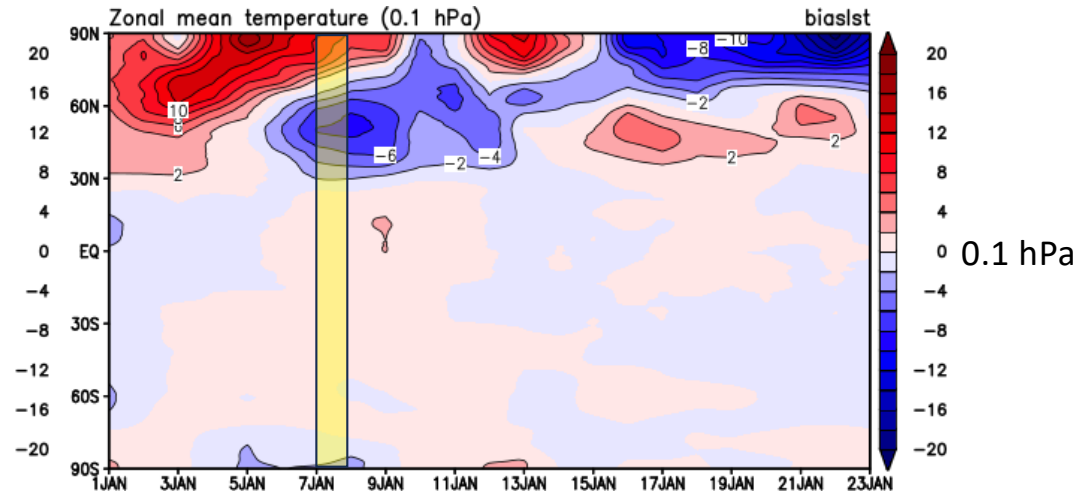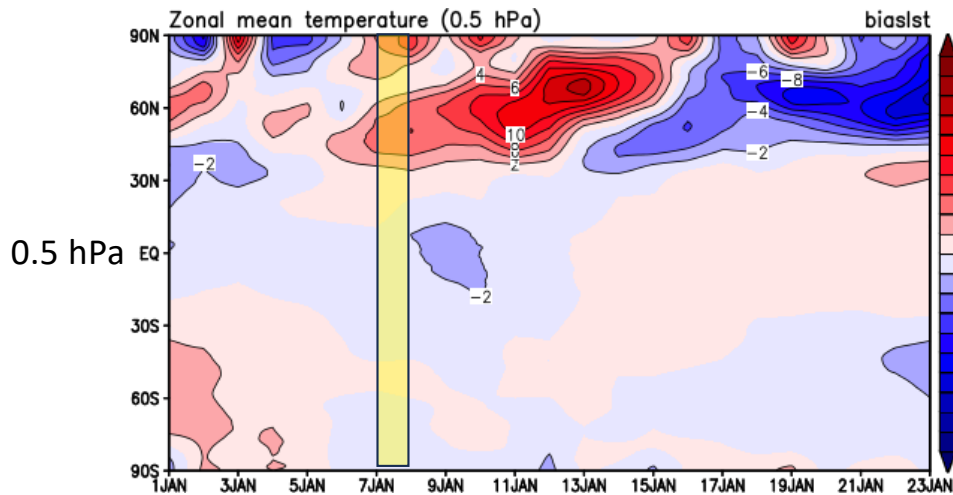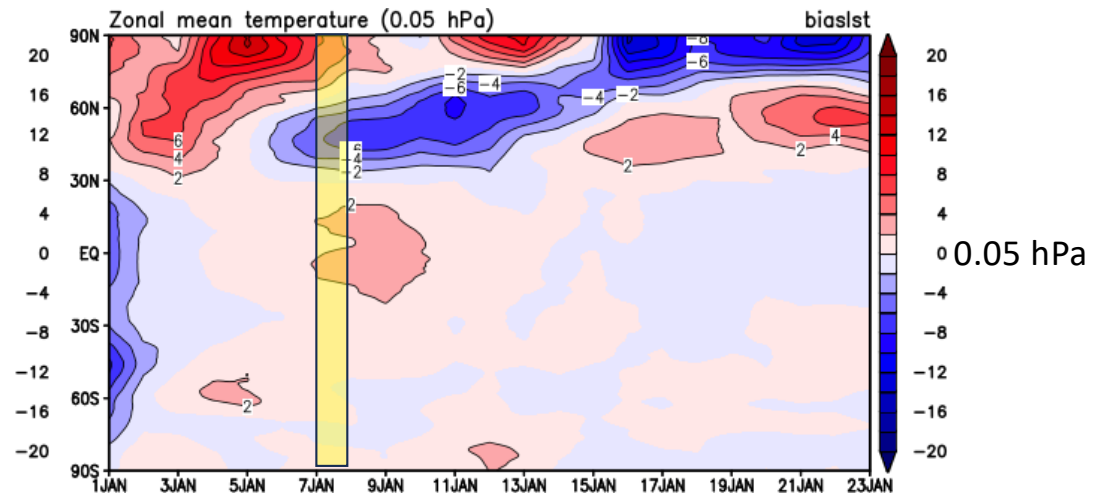



Diurnal variations of zonal mean temperature (biaslst, Day 1-23)

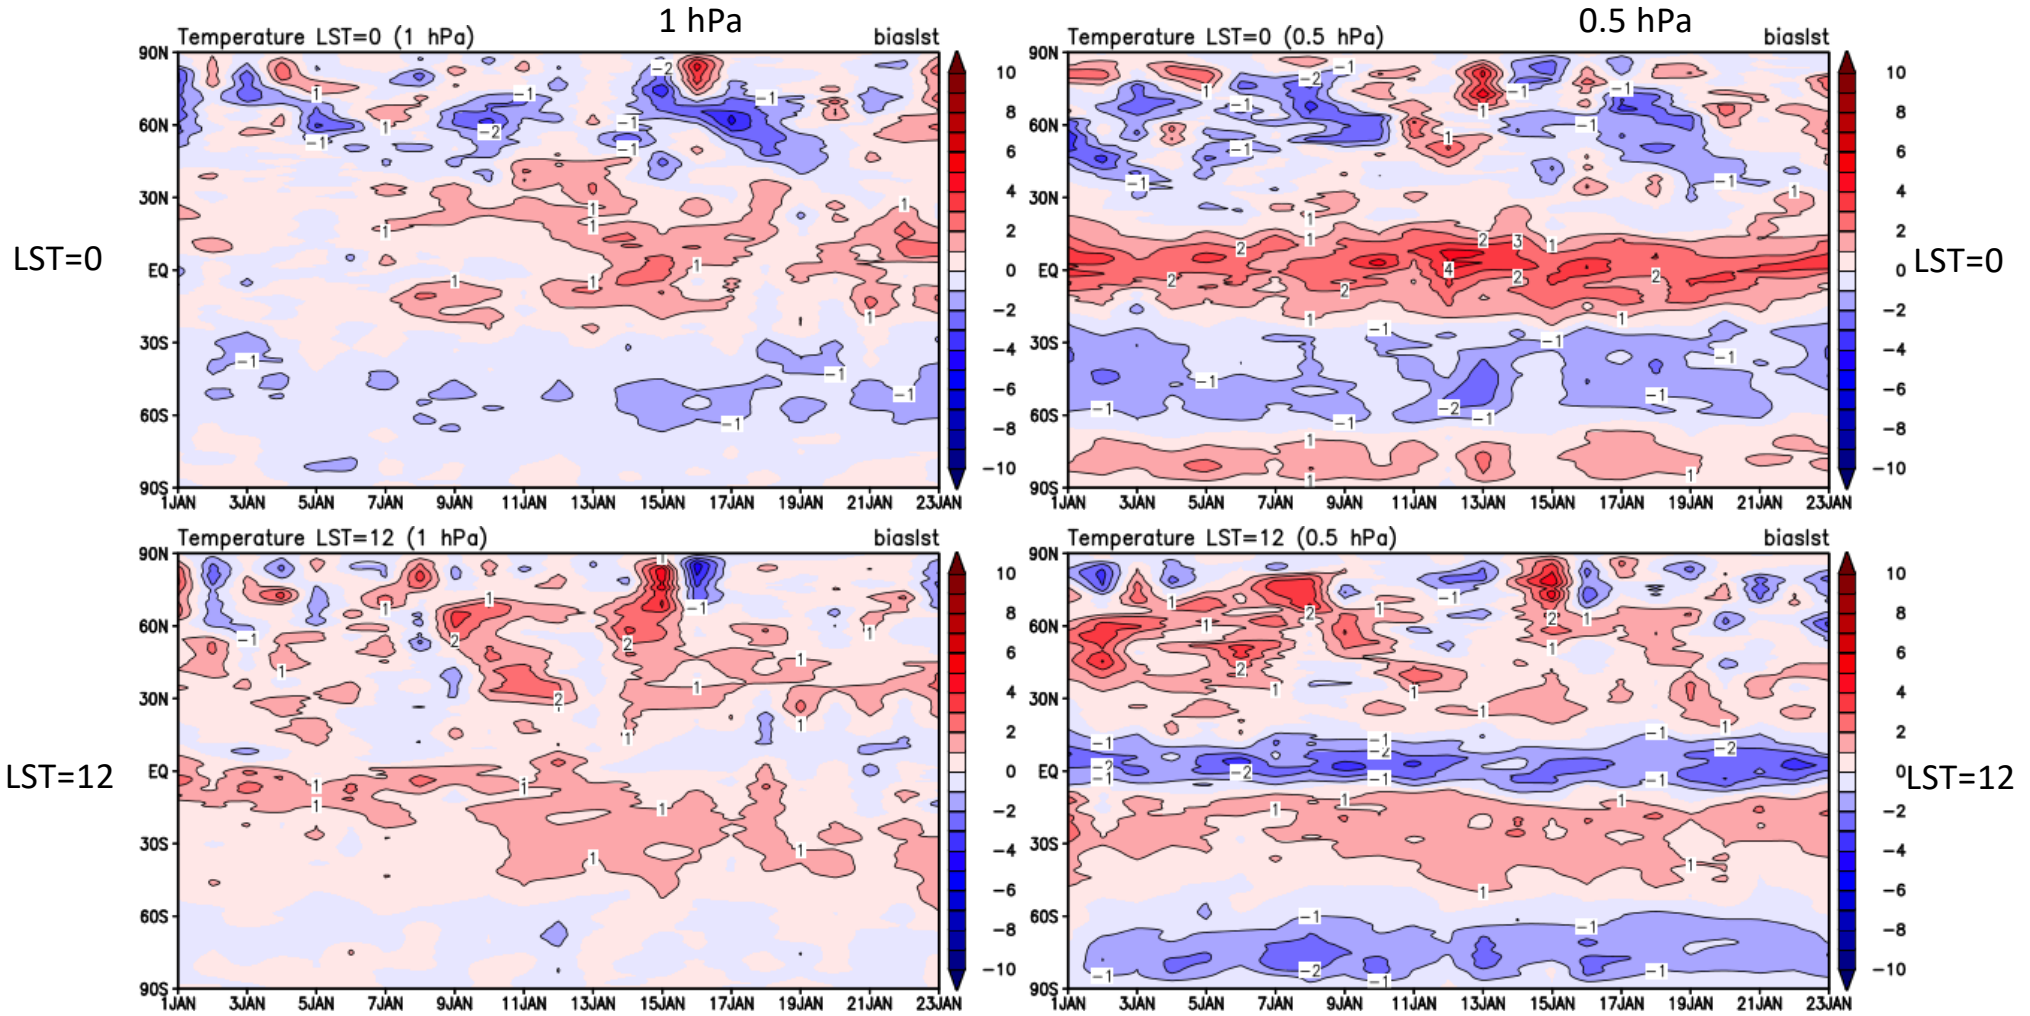

### Diurnal variations of zonal mean temperature (biaslst, Day 1-23)

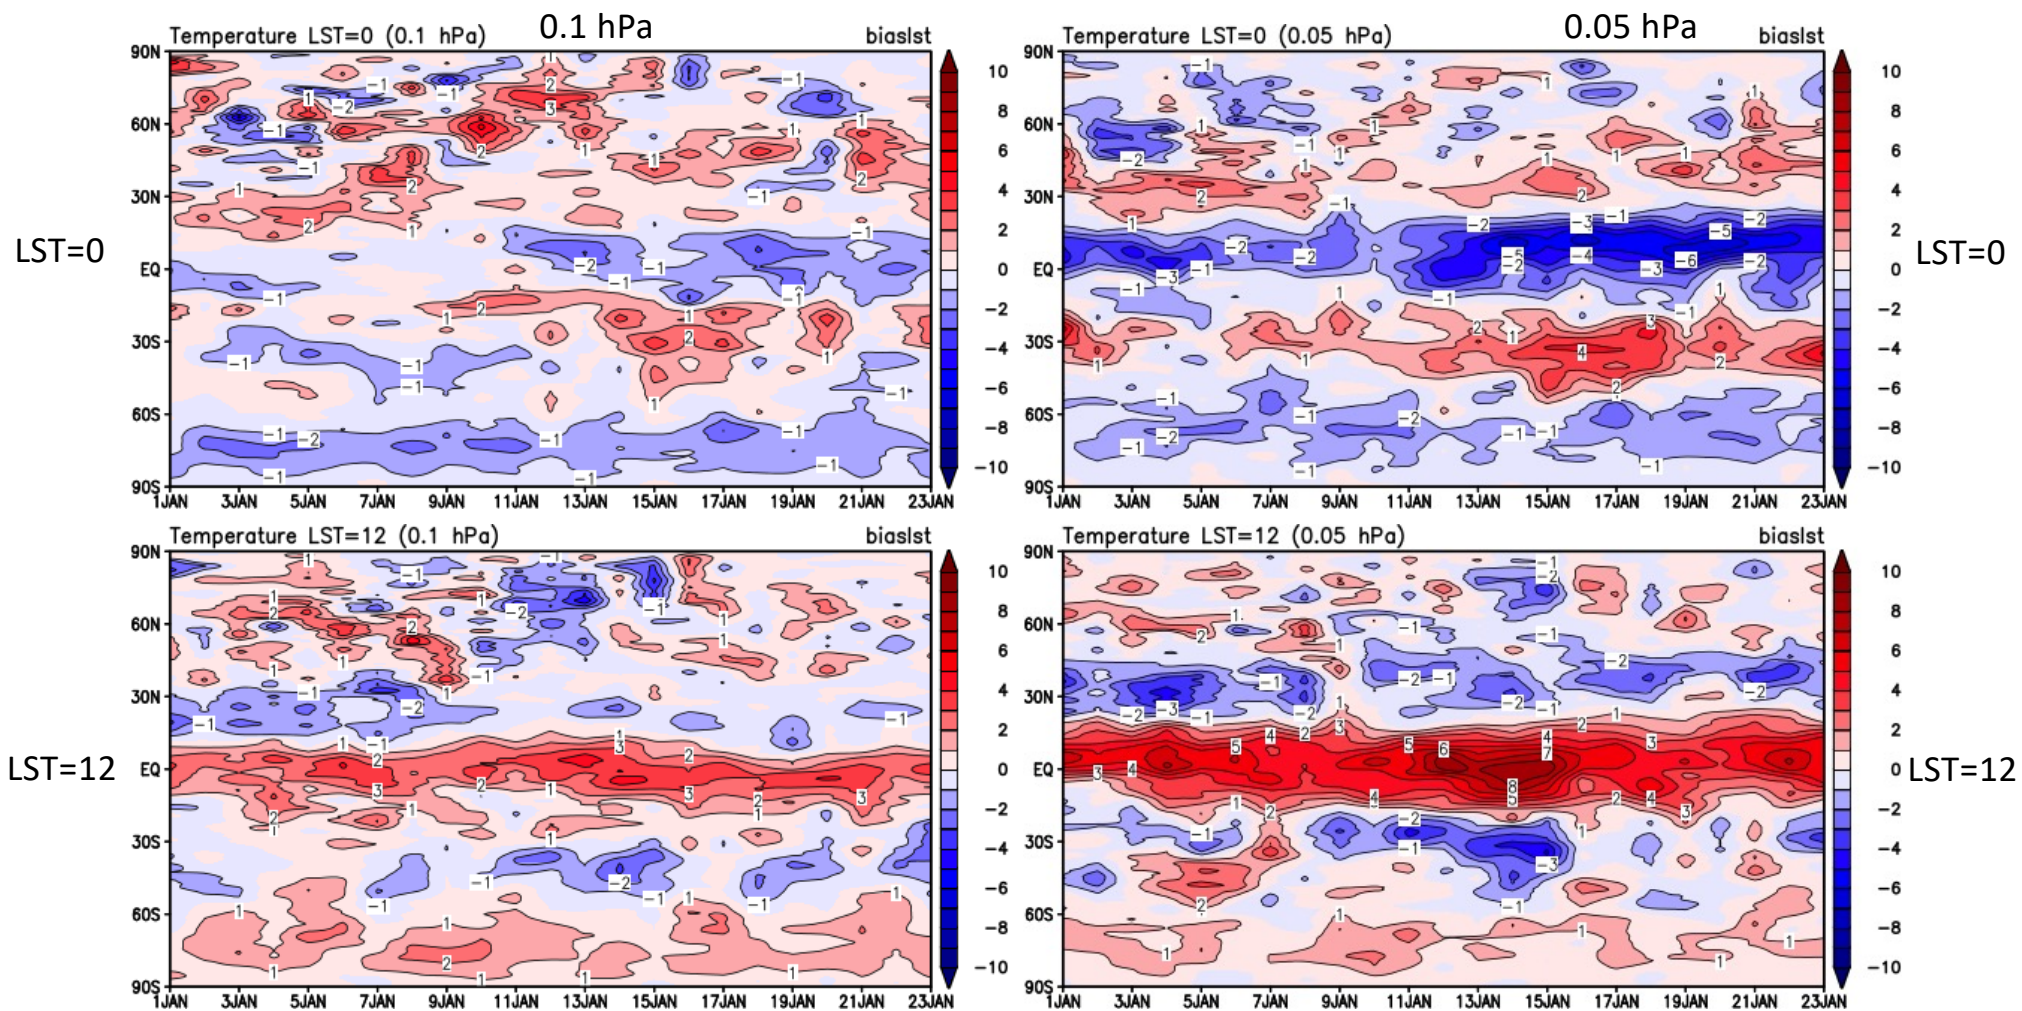

(a) CTL - NoGPS

(b) CTL - BiasM2

(c) CTL - BiasLST

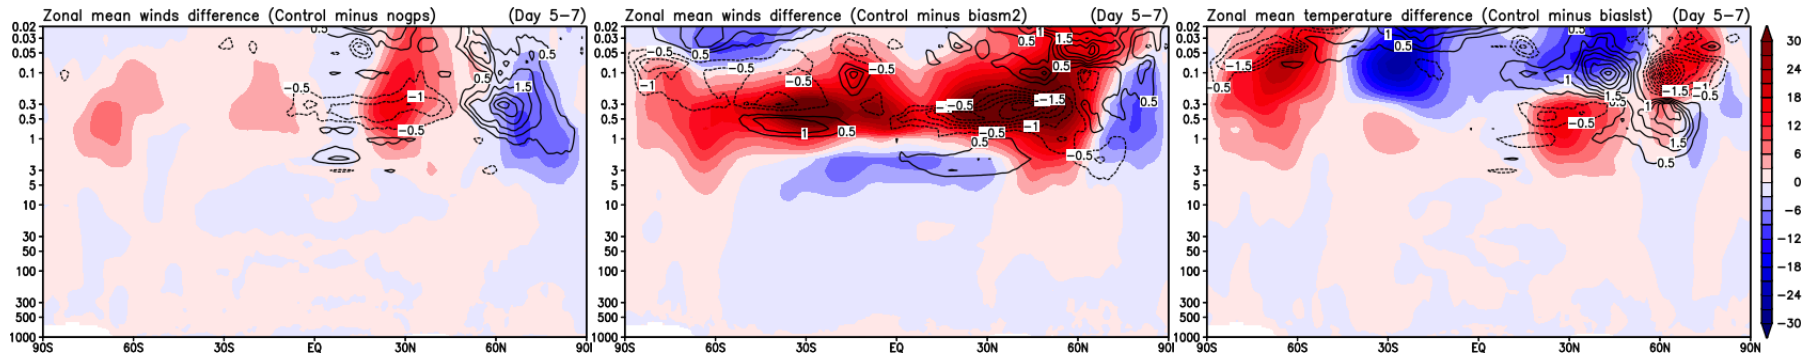

Zonal mean winds differences (Day 5-7)  
shading: zonal winds  
Contour: meridional winds



Control - nogps

Control - biasm2

Control - biaslst

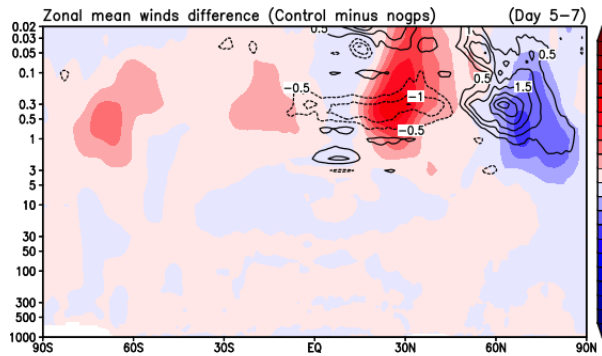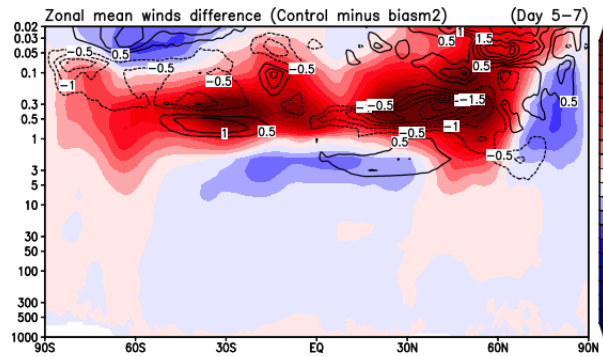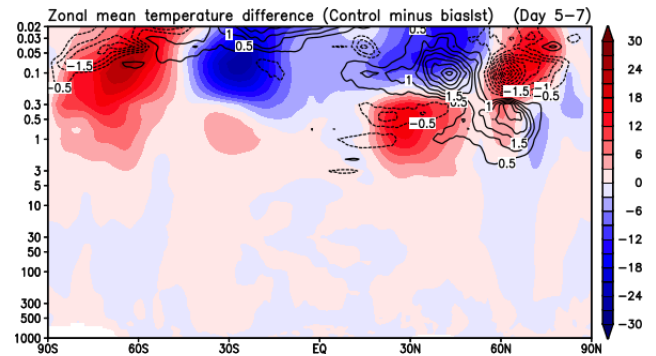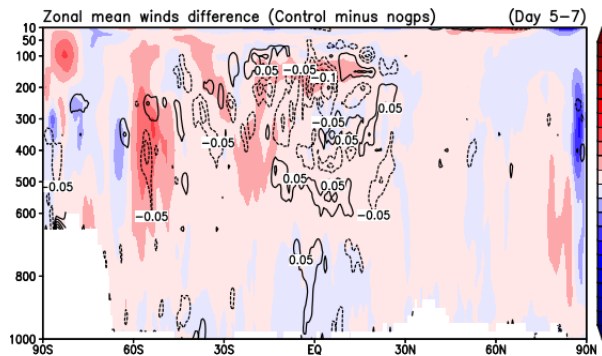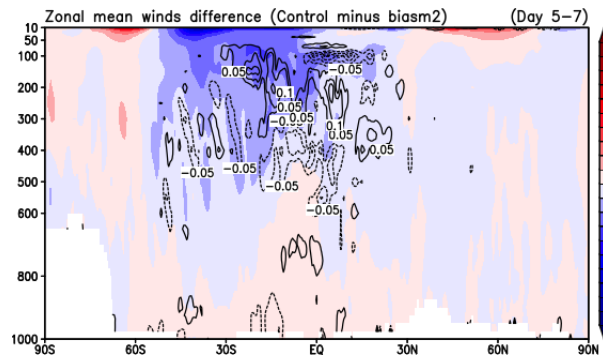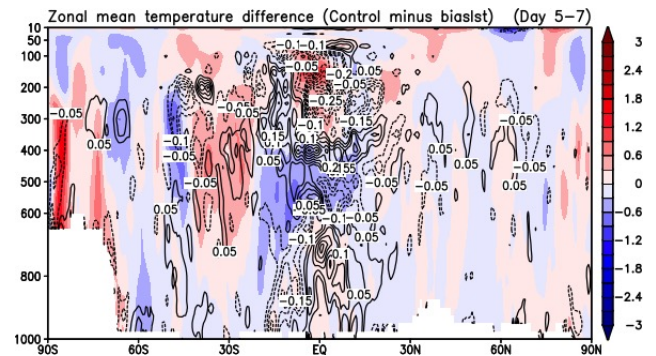

Zonal mean winds differences (Day 5-7)  
shading: zonal winds  
Contour: meridional winds

Control - nogps

Control - biasm2

Control - biaslst

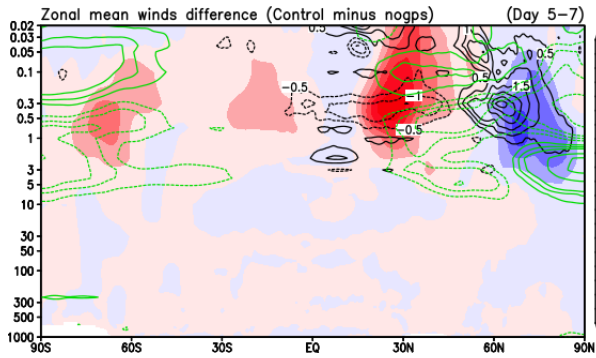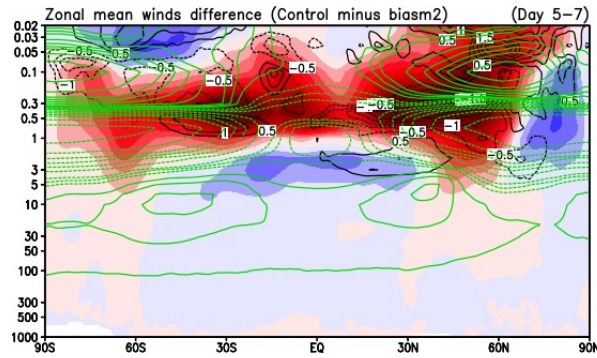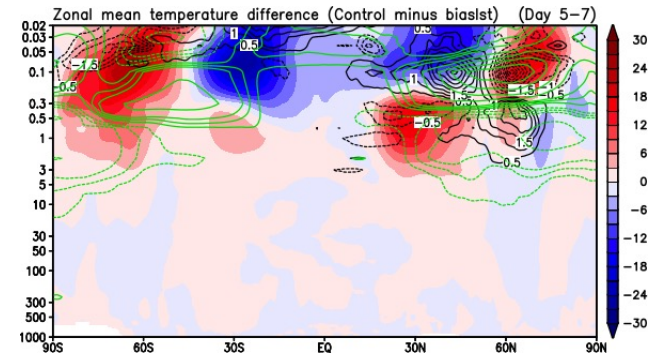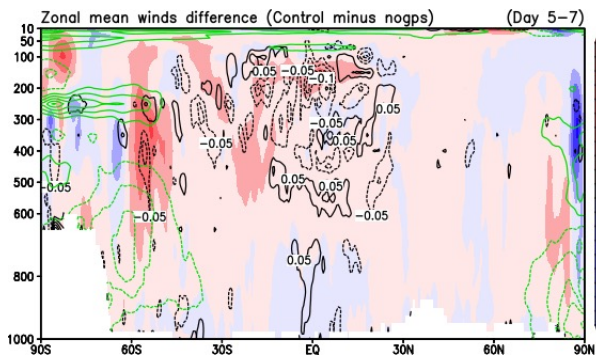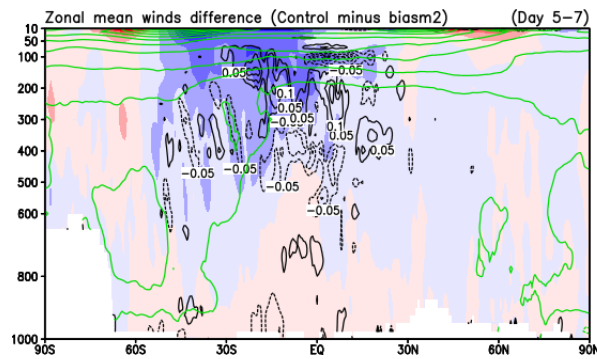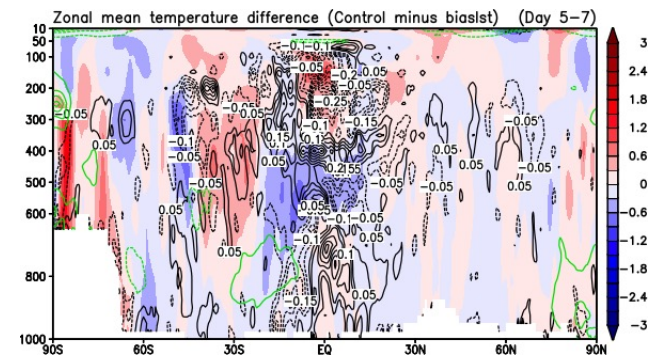

Zonal mean winds differences (Day 5-7)  
shading: zonal winds  
Contour: meridional winds  
Green contour: temperature
